# Supplementary material for: Reference Values and Age and Sex Differences in Physical Performance Measures for Community-Dwelling Older Japanese: A Pooled Analysis of Six Cohort Studies
Source: PLoS One. 2014 Jun 12;9(6):e99487. doi: 10.1371/journal.pone.0099487 (PMC4055685; doi:10.1371/journal.pone.0099487)
Supplement: File S1 — Contains Table S1, Numbers of participants with complete data, by variable and cohort. NANGAI = Nangai Cohort Study; ITABASHI02 = Itabashi Cohort Study 2002; YOITA = Yoita Longitudinal Study; KUSATSU = Kusatsu Longitudinal Study; HATOYAMA = Hatoyama Cohort Study; ITABASHI11 = Itabashi Cohort Study 2011; TMIG-IC = Tokyo Metropolitan Institute of Gerontology Index of Competence. Table S2, Characteristics of male participants according to cohort. a gait speed measured over 5 m, b gait speed measured over 10 m, *one-way analysis of variance or χ2 test. NANGAI = Nangai Cohort Study; ITABASHI02 = Itabashi Cohort Study 2002; YOITA = Yoita Longitudinal Study; KUSATSU = Kusatsu Longitudinal Study; HATOYAMA = Hatoyama Cohort Study; ITABASHI11 = Itabashi Cohort Study 2011; TMIG-IC = Tokyo Metropolitan Institute of Gerontology Index of Competence. Table S3, Characteristics of female participants according to cohort. a gait speed measured over 5 m, b gait speed measured over 10 m, *one-way analysis of variance or χ2 test. NANGAI = Nangai Cohort Study; ITABASHI02 = Itabashi Cohort Study 2002; YOITA = Yoita Longitudinal Study; KUSATSU = Kusatsu Longitudinal Study; HATOYAMA = Hatoyama Cohort Study; ITABASHI11 = Itabashi Cohort Study 2011; TMIG-IC = Tokyo Metropolitan Institute of Gerontology Index of Competence. Table S4, Characteristics of male participants according to age group. *weighted one-way analysis of variance or χ2 test. NANGAI = Nangai Cohort Study; ITABASHI02 = Itabashi Cohort Study 2002; YOITA = Yoita Longitudinal Study; KUSATSU = Kusatsu Longitudinal Study; HATOYAMA = Hatoyama Cohort Study; ITABASHI11 = Itabashi Cohort Study 2011; TMIG-IC = Tokyo Metropolitan Institute of Gerontology Index of Competence. Table S5, Characteristics of female participants according to age group. *weighted one-way analysis of variance or χ2 test. NANGAI = Nangai Cohort Study; ITABASHI02 = Itabashi Cohort Study 2002; YOITA = Yoita Longitudinal Study; KUSATSU = Kusatsu Longitudinal Study; [file pone.0099487.s001.xlsx]

## Sheet: Table S1
Table S1. Numbers of participants with complete data, by variable and cohort
Variables	Sample with complete data (n)
	Men (n = 2168)													Women (n = 2515)
	NANGAI		ITABASHI02		YOITA		KUSATSU		HATOYAMA		ITABASHI11			NANGAI		ITABASHI02		YOITA		KUSATSU		HATOYAMA		ITABASHI11
	(n = 434)		(n = 448)		(n = 250)		(n = 255)		(n = 425)		(n = 356)			(n = 592)		(n = 385)		(n = 352)		(n = 339)		(n = 309)		(n = 538)
Age	434		448		250		255		425		356			592		385		352		339		309		538
Height	434		448		250		254		423		356			592		385		352		339		309		538
Weight	434		448		250		255		423		356			592		385		352		339		309		538
Body mass index	434		448		250		254		423		356			592		385		352		339		309		538
Chronic disease
Hypertension	434		448		246		255		425		356			592		385		349		337		309		538
Stroke	434		448		246		255		425		356			592		385		348		338		309		538
Heart disease	433		448		242		254		425		356			592		385		340		337		309		538
Diabetes mellitus	434		448		246		255		425		356			592		385		350		339		309		538
Self-rated health	434		446		250		255		425		356			592		385		352		339		309		538
Alcohol drinking status	434		447		248		255		425		356			592		385		351		339		309		538
Smoking status	434		447		249		255		425		354			592		385		351		339		308		538
TMIG-IC	434		447		250		255		425		356			592		385		352		339		309		538
Physical performance measures
Hand-grip strength	419		407		248		252		423		348			561		370		348		336		307		532
One-legged stance with eyes open, s	433		-		-		252		424		354			591		-		-		330		307		538
Usual gait speed over 5 m	434		447		246		250		422		-			592		385		347		335		309		-
Usual gait step length	434		-		246		250		422		-			591		-		347		335		309		-
Maximum gait speed over 5 m	417		402		243		246		420		-			548		366		345		323		303		-
Maximum gait step length	417		-		243		246		420		-			548		-		345		323		303		-
Usual gait speed over 10m	-		-		-		-		-		355			-		-		-		-		-		538
Maximum gait speed over 10m	-		-		-		-		-		347			-		-		-		-		-		529
NANGAI = Nangai Cohort Study; ITABASHI02 = Itabashi Cohort Study 2002; YOITA = Yoita Longitudinal Study; KUSATSU = Kusatsu Longitudinal Study; HATOYAMA = Hatoyama Cohort Study; ITABASHI11 = Itabashi Cohort Study 2011; TMIG-IC = Tokyo Metropolitan Institute of Gerontology Index of Competence.

## Sheet: Table S2
Table S2. Characteristics of male participants according to cohort
Variables	Mean ± standard deviation or n (%)
	Overall				NANGAI				ITABASHI02				YOITA				KUSATSU				HATOYAMA				ITABASHI11
	(n = 2168)				(n = 434)				(n = 448)				(n = 250)				(n = 255)				(n = 425)				(n = 356)			P value*
Age, years	73.97	±	5.278		72.86	±	5.468		76.13	±	3.551		76.55	±	4.835		73.65	±	6.138		71.63	±	5.016		73.78	±	5.054	< 0.001
Age group, n (%)																												< 0.001
65-69	481	-22.2			140	-32.3			-				-				76	-29.8			175	-41.2			90	-25.3
70-74	727	-33.5			142	-32.7			175	-39.1			98	-39.2			76	-29.8			133	-31.3			103	-28.9
75-79	615	-28.4			94	-21.7			181	-40.4			96	-38.4			55	-21.6			79	-18.6			110	-30.9
80-84	297	-13.7			43	-9.9			92	-20.5			35	-14			36	-14.1			38	-8.9			53	-14.9
85 or over	48	-2.2			15	-3.5			-				21	-8.4			12	-4.7			-				-
Height, cm	160.654	±	6.3475		157.563	±	5.8495		161.037	±	5.5751		157.352	±	6.358		160.68	±	6.0555		163.257	±	5.7585		163.148	±	6.0806	< 0.001
Weight, kg	59.885	±	9.4341		56.288	±	8.8379		60.534	±	8.9651		56.169	±	8.4086		60.321	±	9.899		62.957	±	8.9497		62.103	±	9.4361	< 0.001
Body mass index, kg/m2	23.1532	±	3.03759		22.6322	±	3.02535		23.3069	±	2.98093		22.6533	±	2.87127		23.32	±	3.29553		23.5901	±	2.89565		23.3076	±	3.09743	< 0.001
Chronic disease, n (%)
Hypertension	981	-45.3			176	-40.6			201	-44.9			122	-49.6			101	-39.6			203	-47.8			178	-50		0.02
Stroke	179	-8.3			26	-6			47	-10.5			19	-7.7			17	-6.7			38	-8.9			32	-9		0.197
Heart disease	459	-21.3			88	-20.3			93	-20.8			58	-24			31	-12.2			113	-26.6			76	-21.3		0.001
Diabetes mellitus	300	-13.9			34	-7.8			58	-12.9			38	-15.4			36	-14.1			79	-18.6			55	-15.4		< 0.001
Self-rated health, n (%)																												< 0.001
Excellent to good	1777	-82			326	-75.1			367	-82.3			216	-86.4			220	-86.3			361	-84.9			287	-80.6
Fair to poor	389	-18			108	-24.9			79	-17.7			34	-13.6			35	-13.7			64	-15.1			69	-19.4
Alcohol drinking status, n (%)																												0.003
Current	1426	-65.9			286	-65.9			281	-62.9			178	-71.8			154	-60.4			287	-67.5			240	-67.4
Past	245	-11.3			48	-11.1			66	-14.8			25	-10.1			34	-13.3			27	-6.4			45	-12.6
Never	494	-22.8			100	-23			100	-22.4			45	-18.1			67	-26.3			111	-26.1			71	-19.9
Smoking status, n (%)																												< 0.001
Current	526	-24.3			133	-30.6			130	-29.1			67	-26.9			54	-21.2			74	-17.4			68	-19.2
Past	1048	-48.4			118	-27.2			243	-54.4			128	-51.4			124	-48.6			235	-55.3			200	-56.5
Never	590	-27.3			183	-42.2			74	-16.6			54	-21.7			77	-30.2			116	-27.3			86	-24.3
TMIG-IC, score (0-13)	12.02	±	1.567		12.1	±	1.665		11.62	±	1.83		11.85	±	1.69		11.94	±	1.623		12.29	±	1.125		12.28	±	1.268	< 0.001
Instrumental self-maintenance (0-5)	4.83	±	0.573		4.86	±	0.607		4.71	±	0.706		4.77	±	0.614		4.75	±	0.699		4.94	±	0.335		4.92	±	0.362	< 0.001
Intellectual activity (0-4)	3.65	±	0.669		3.57	±	0.81		3.57	±	0.704		3.56	±	0.688		3.58	±	0.705		3.8	±	0.479		3.76	±	0.53	< 0.001
Social role (0-4)	3.54	±	0.828		3.67	±	0.729		3.34	±	0.958		3.52	±	0.87		3.61	±	0.781		3.55	±	0.763		3.6	±	0.8	< 0.001
Physical performance measures
Hand-grip strength, kg	31.6998	±	6.71736		31.3914	±	6.60321		29.5749	±	6.37256		29.0544	±	6.3987		32.9563	±	6.51875		34.4917	±	5.9063		32.1379	±	6.9972	< 0.001
One-legged stance with eyes open, s	39.2855	±	23.0117		40.8176	±	22.3816		-				-				39.0488	±	22.0925		40.3901	±	23.2051		36.2571	±	23.9631	0.028
Usual gait speed, m/s	1.2941	±	0.25013		1.2931	±	0.25a		1.1998	±	0.24a		1.2778	±	0.26a		1.3931	±	0.23a		1.3217	±	0.25a		1.3231	±	0.23b	< 0.001
Usual gait step length, cm	67.7	±	10.019		66.1	±	10.446		-				65.59	±	10.435		70.66	±	9.169		68.82	±	9.224		-			< 0.001
Maximum gait speed, m/s	1.9379	±	0.38159		1.9818	±	0.41a		1.8131	±	0.34a		1.8601	±	0.36a		2.0332	±	0.34a		2.0223	±	0.39a		1.9145	±	0.38b	< 0.001
Maximum gait step length, cm	82.29	±	11.589		79.9	±	12.141		-				80.15	±	11.777		85.09	±	10.991		84.25	±	10.529		-			< 0.001
a gait speed measured over 5 m, b gait speed measured over 10 m, *one-way analysis of variance or χ2 test.
NANGAI = Nangai Cohort Study; ITABASHI02 = Itabashi Cohort Study 2002; YOITA = Yoita Longitudinal Study; KUSATSU = Kusatsu Longitudinal Study; HATOYAMA = Hatoyama Cohort Study; ITABASHI11 = Itabashi Cohort Study 2011; TMIG-IC = Tokyo Metropolitan Institute of Gerontology Index of Competence.

## Sheet: Table S3
Table S3. Characteristics of female participants according to cohort
Variables	Mean ± standard deviation or n (%)
	Overall				NANGAI				ITABASHI02				YOITA				KUSATSU				HATOYAMA				ITABASHI11
	(n = 2515)				(n = 592)				(n = 385)				(n = 352)				(n = 339)				(n = 309)				(n = 538)			P value*
Age, years	73.93	±	5.461		73.36	±	6.018		76.11	±	3.689		76.09	±	4.471		73.36	±	6.253		71.72	±	5.477		73.2	±	4.976	< 0.001
Age groups, n (%)																												< 0.001
65-69	588	-23.4			188	-31.8			-				-				119	-35.1			142	-46			139	-25.8
70-74	847	-33.7			183	-30.9			151	-39.2			152	-43.2			87	-25.7			70	-22.7			204	-37.9
75-79	658	-26.2			128	-21.6			155	-40.3			122	-34.7			69	-20.4			60	-19.4			124	-23
80-84	354	-14.1			63	-10.6			79	-20.5			59	-16.8			45	-13.3			37	-12			71	-13.2
85 or over	68	-2.7			30	-5.1			-				19	-5.4			19	-5.6			-				-
Height, cm	147.623	±	6.2364		144.56	±	6.076		147.985	±	5.3854		145.264	±	5.7866		147.655	±	5.8431		150.182	±	5.6047		150.786	±	5.6076	< 0.001
Weight, kg	50.518	±	8.3619		49.43	±	8.7945		50.838	±	8.2146		49.39	±	7.8561		50.59	±	8.4831		52.278	±	7.805		51.167	±	8.305	< 0.001
Body mass index, kg/m2	23.1632	±	3.46796		23.6012	±	3.64555		23.2115	±	3.53932		23.3837	±	3.30216		23.1608	±	3.36603		23.1658	±	3.14919		22.5023	±	3.4771	< 0.001
Chronic disease, n (%)
Hypertension	1216	-48.4			301	-50.8			207	-53.8			207	-59.3			136	-40.4			136	-44			229	-42.6		< 0.001
Stroke	104	-4.1			34	-5.7			23	-6			9	-2.6			11	-3.3			13	-4.2			14	-2.6		0.023
Heart disease	420	-16.8			102	-17.2			91	-23.6			89	-26.2			34	-10.1			38	-12.3			66	-12.3		< 0.001
Diabetes mellitus	232	-9.2			55	-9.3			22	-5.7			48	-13.7			22	-6.5			36	-11.7			49	-9.1		0.002
Self-rated health, n (%)																												< 0.001
Excellent to good	1997	-79.4			410	-69.3			287	-74.5			294	-83.5			290	-85.5			271	-87.7			445	-82.7
Fair to poor	518	-20.6			182	-30.7			98	-25.5			58	-16.5			49	-14.5			38	-12.3			93	-17.3
Alcohol drinking status, n (%)																												< 0.001
Current	581	-23.1			102	-17.2			112	-29.1			56	-16			84	-24.8			63	-20.4			164	-30.5
Past	137	-5.4			16	-2.7			18	-4.7			10	-2.8			38	-11.2			15	-4.9			40	-7.4
Never	1796	-71.4			474	-80.1			255	-66.2			285	-81.2			217	-64			231	-74.8			334	-62.1
Smoking status, n (%)																												< 0.001
Current	107	-4.3			7	-1.2			24	-6.2			5	-1.4			36	-10.6			10	-3.2			25	-4.6
Past	130	-5.2			3	-0.5			28	-7.3			4	-1.1			26	-7.7			15	-4.9			54	-10
Never	2276	-90.6			582	-98.3			333	-86.5			342	-97.4			277	-81.7			283	-91.9			459	-85.3
TMIG-IC, score (0-13)	11.99	±	1.682		11.45	±	2.215		12.1	±	1.379		11.65	±	1.619		11.88	±	1.707		12.41	±	1.32		12.56	±	1.047	< 0.001
Instrumental self-maintenance (0-5)	4.85	±	0.591		4.69	±	0.861		4.9	±	0.426		4.84	±	0.569		4.83	±	0.622		4.93	±	0.446		4.9	±	0.274	< 0.001
Intellectual activity (0-4)	3.49	±	0.88		3.08	±	1.176		3.66	±	0.674		3.25	±	0.888		3.48	±	0.847		3.78	±	0.548		3.83	±	0.487	< 0.001
Social role (0-4)	3.65	±	0.747		3.67	±	0.777		3.55	±	0.773		3.56	±	0.845		3.58	±	0.782		3.7	±	0.681		3.77	±	0.611	< 0.001
Physical performance measures
Hand-grip strength, kg	20.3534	±	4.95406		21.1141	±	5.26455		17.9784	±	4.54839		19.717	±	4.81064		19.9077	±	4.74189		21.5691	±	4.37278		21.1992	±	4.78952	< 0.001
One-legged stance with eyes open, s	36.821	±	23.4442		30.4112	±	23.1257		-				-				37.2688	±	23.4046		38.0463	±	23.4853		42.8885	±	22.0443	< 0.001
Usual gait speed, m/s	1.2455	±	0.27402		1.2006	±	0.28a		1.0991	±	0.26a		1.2193	±	0.29a		1.3157	±	0.25a		1.3198	±	0.25a		1.3301	±	0.23b	< 0.001
Usual gait step length, cm	60.84	±	10.003		58.06	±	9.993		-				59.93	±	9.872		63.68	±	9.507		64.1	±	8.927		-			< 0.001
Maximum gait speed, m/s	1.7306	±	0.35637		1.718	±	0.39a		1.5676	±	0.34a		1.6651	±	0.36a		1.7893	±	0.31a		1.8633	±	0.34a		1.7873	±	0.31b	< 0.001
Maximum gait step length, cm	69.68	±	10.778		67.17	±	10.926		-				67.72	±	11.246		72.76	±	9.771		73.16	±	9.149		-			< 0.001
a gait speed measured over 5 m, b gait speed measured over 10 m, *one-way analysis of variance or χ2 test.
NANGAI = Nangai Cohort Study; ITABASHI02 = Itabashi Cohort Study 2002; YOITA = Yoita Longitudinal Study; KUSATSU = Kusatsu Longitudinal Study; HATOYAMA = Hatoyama Cohort Study; ITABASHI11 = Itabashi Cohort Study 2011; TMIG-IC = Tokyo Metropolitan Institute of Gerontology Index of Competence.

## Sheet: Table S4
Table S4. Characteristics of male participants according to age group (n = 2168)
Variables	Mean ± standard deviation or n (%)
					Age group
	Overall (n = 2168)				65-69 (n = 481)				70-74 (n = 727)				75-79 (n = 615)				80-84 (n = 297)				85 or over (n = 48)			P value*
Geographic area, n (%)																								< 0.001
NANGAI	434	-20			140	-29.1			142	-19.5			94	-15.3			43	-14.5			15	-31.3
ITABASHI02	448	-20.7			-				175	-24.1			181	-29.4			92	-31			-
YOITA	250	-11.5			-				98	-13.5			96	-15.6			35	-11.8			21	-43.8
KUSATSU	255	-11.8			76	-15.8			76	-10.5			55	-8.9			36	-12.1			12	-25
HATOYAMA	425	-19.6			175	-36.4			133	-18.3			79	-12.8			38	-12.8			-
ITABASHI11	356	-16.4			90	-18.7			103	-14.2			110	-17.9			53	-17.8			-
Height, cm	160.654	±	6.3475		162.685	±	6.1918		161.046	±	6.2482		160.165	±	6.0127		158.486	±	6.1323		154.031	±	5.6365	< 0.001
Weight, kg	59.885	±	9.4341		62.097	±	9.7644		60.869	±	9.2059		59.036	±	9.1937		56.901	±	8.6336		52.223	±	7.4993	< 0.001
Body mass index, kg/m2	23.1532	±	3.03759		23.4115	±	3.06423		23.4321	±	3.02831		22.9679	±	3.00418		22.627	±	3.03376		21.9693	±	2.54846	< 0.001
Chronic disease, n (%)
Hypertension	981	-45.3			191	-39.7			337	-46.4			292	-47.6			139	-46.8			22	-47.8		0.089
Stroke	179	-8.3			35	-7.3			51	-7			59	-9.6			32	-10.8			2	-4.3		0.136
Heart disease	459	-21.3			78	-16.2			158	-21.8			145	-23.8			71	-24			7	-14.9		0.016
Diabetes mellitus	300	-13.9			77	-16			110	-15.2			79	-12.9			30	-10.1			4	-8.5		0.092
Self-rated health, n (%)																								0.221
Excellent to good	1777	-82			406	-84.4			600	-82.5			493	-80.3			236	-79.7			42	-87.5
Fair to poor	389	-18			75	-15.6			127	-17.5			121	-19.7			60	-20.3			6	-12.5
Alcohol drinking status, n (%)																								0.001
Current	1426	-65.9			342	-71.1			495	-68.4			397	-64.6			167	-56.2			25	-52.1
Past	245	-11.3			45	-9.4			68	-9.4			79	-12.8			44	-14.8			9	-18.8
Never	494	-22.8			94	-19.5			161	-22.2			139	-22.6			86	-29			14	-29.2
Smoking status, n (%)																								< 0.001
Current	526	-24.3			136	-28.3			172	-23.7			145	-23.6			65	-21.9			8	-16.7
Past	1048	-48.4			188	-39.2			337	-46.5			340	-55.4			166	-55.9			17	-35.4
Never	590	-27.3			156	-32.5			216	-29.8			129	-21			66	-22.2			23	-47.9
TMIG-IC, score (0-13)	12.02	±	1.567		12.19	±	1.379		12.1	±	1.413		11.99	±	1.536		11.77	±	1.875		11.04	±	2.873	< 0.001
Instrumental self-maintenance (0-5)	4.83	±	0.573		4.9	±	0.461		4.87	±	0.433		4.81	±	0.625		4.72	±	0.744		4.56	±	1.128	< 0.001
Intellectual activity (0-4)	3.65	±	0.669		3.66	±	0.692		3.66	±	0.646		3.64	±	0.639		3.64	±	0.693		3.44	±	0.943	0.169
Social role (0-4)	3.54	±	0.828		3.63	±	0.741		3.56	±	0.819		3.55	±	0.789		3.4	±	0.922		3.04	±	1.304	< 0.001
*weighted one-way analysis of variance or χ2 test. NANGAI = Nangai Cohort Study; ITABASHI02 = Itabashi Cohort Study 2002; YOITA = Yoita Longitudinal Study; KUSATSU = Kusatsu Longitudinal Study; HATOYAMA = Hatoyama Cohort Study; ITABASHI11 = Itabashi Cohort Study 2011; TMIG-IC = Tokyo Metropolitan Institute of Gerontology Index of Competence.

## Sheet: Table S5
Table S5. Characteristics of female participants according to age group (n = 2515)
Variables	Mean ± standard deviation or n (%)
					Age group
	Overall (n = 2515)				65-69 (n = 588)				70-74 (n = 847)				75-79 (n = 658)				80-84 (n = 354)				85 or over (n = 68)			P value*
Geographic area, n (%)																								< 0.001
NANGAI	592	-23.5			188	-32			183	-21.6			128	-19.5			63	-17.8			30	-44.1
ITABASHI02	385	-15.3			-				151	-17.8			155	-23.6			79	-22.3			-
YOITA	352	-14			-				152	-17.9			122	-18.5			59	-16.7			-
KUSATSU	339	-13.5			119	-20.2			87	-10.3			69	-10.5			45	-12.7			19	-27.9
HATOYAMA	309	-12.3			142	-24.1			70	-8.3			60	-9.1			37	-10.5			-
ITABASHI11	538	-21.4			139	-23.6			204	-24.1			124	-18.8			71	-20.1			19	-27.9
Height, cm	147.623	±	6.2364		150.053	±	5.6149		148.621	±	5.7213		146.431	±	6.0681		144.78	±	6.1067		140.499	±	6.3001	< 0.001
Weight, kg	50.518	±	8.3619		52.72	±	8.3755		51.373	±	7.9394		49.43	±	8.177		47.929	±	8.2868		44.818	±	7.9898	< 0.001
Body mass index, kg/m2	23.1632	±	3.46796		23.4297	±	3.62633		23.2518	±	3.30951		23.0357	±	3.47075		22.8447	±	3.55944		22.6453	±	3.34565	0.002
Chronic disease, n (%)
Hypertension	1216	-48.4			208	-35.4			407	-48.2			352	-53.6			214	-60.6			35	-51.5		< 0.001
Stroke	104	-4.1			16	-2.7			34	-4			30	-4.6			21	-5.9			3	-4.5		0.182
Heart disease	420	-16.8			52	-8.8			148	-17.6			129	-19.6			74	-21.2			17	-26.6		< 0.001
Diabetes mellitus	232	-9.2			46	-7.8			66	-7.8			74	-11.2			38	-10.8			8	-11.8		0.086
Self-rated health, n (%)																								0.011
Excellent to good	1997	-79.4			485	-82.5			682	-80.5			519	-78.9			256	-72.3			55	-80.9
Fair to poor	518	-20.6			103	-17.5			165	-19.5			139	-21.1			98	-27.7			13	-19.1
Alcohol drinking status, n (%)																								0.11
Current	581	-23.1			154	-26.2			205	-24.2			132	-20.1			77	-21.8			13	-19.1
Past	137	-5.4			31	-5.3			52	-6.1			35	-5.3			13	-3.7			6	-8.8
Never	1796	-71.4			403	-68.5			589	-69.6			491	-74.6			264	-74.6			49	-72.1
Smoking status, n (%)																								0.287
Current	107	-4.3			33	-5.6			38	-4.5			23	-3.5			10	-2.8			3	-4.4
Past	130	-5.2			31	-5.3			47	-5.6			35	-5.3			17	-4.8			0	(0)
Never	2276	-90.6			523	-89.1			761	-90			600	-91.2			327	-92.4			65	-95.6
TMIG-IC, score (0-13)	11.99	±	1.682		12.32	±	1.253		12.25	±	1.252		11.95	±	1.633		11.37	±	2.094		9.53	±	3.651	< 0.001
Instrumental self-maintenance (0-5)	4.85	±	0.591		4.94	±	0.315		4.94	±	0.331		4.86	±	0.548		4.64	±	0.871		3.91	±	1.609	< 0.001
Intellectual activity (0-4)	3.49	±	0.88		3.6	±	0.779		3.58	±	0.791		3.48	±	0.883		3.31	±	0.985		2.63	±	1.413	< 0.001
Social role (0-4)	3.65	±	0.747		3.77	±	0.602		3.73	±	0.612		3.62	±	0.765		3.42	±	0.952		2.99	±	1.252	< 0.001
*weighted one-way analysis of variance or χ2 test. NANGAI = Nangai Cohort Study; ITABASHI02 = Itabashi Cohort Study 2002; YOITA = Yoita Longitudinal Study; KUSATSU = Kusatsu Longitudinal Study; HATOYAMA = Hatoyama Cohort Study; ITABASHI11 = Itabashi Cohort Study 2011; TMIG-IC = Tokyo Metropolitan Institute of Gerontology Index of Competence.

## Sheet: Table S6
Table S6. Weighted means of physical performance measures obtained from random effects meta-analysis model according to sex and age group across all cohort studies
Variables						Age group
	Overall					65-69					70-74					75-79					80-84					85 or over
	Weighted mean (95% CI)		Number of studies	I2 (%)		Weighted mean (95% CI)		Number of studies	I2 (%)		Weighted mean (95% CI)		Number of studies	I2 (%)		Weighted mean (95% CI)		Number of studies	I2 (%)		Weighted mean (95% CI)		Number of studies	I2 (%)		Weighted mean (95% CI)		Number of studies	I2 (%)
Men
Hand-grip strength, kg	31.6	(29.9-33.3)	6	0		35.24	(33.9-36.6)	4	0		32.79	(31.4-34.2)	6	0		30.4	(29.5-31.2)	6	5.2		27.88	(26.8-29.0)	6	0		23.34	(21.8-24.9)	3	0
One-legged stance with eyes open, s	39.23	(37.5-41.0)	4	0.4		46.97	(44.5-49.4)	4	1.1		41.62	(39.3-43.9)	4	0.7		33.35	(30.1-36.6)	4	8.3		25.98	(23.0-29.0)	4	1.6		20.53	(11.7-29.3)	2	0
Usual gait speed, m/s	1.3	(1.25-1.35)	6	0		1.4	(1.36-1.43)	4	22.6		1.34	(1.29-1.39)	6	0		1.27	(1.22-1.32)	6	0		1.17	(1.11-1.22)	6	0		1.13	(1.02-1.25)	3	0
Usual gait step length, cm	67.803	(65.6-70.0)	4	10.6		71.73	(69.8-73.7)	3	29.2		69.73	(68.1-71.4)	4	1.9		65.9	(63.0-68.7)	4	0		61	(57.6-64.3)	4	0		57.9	(53.2-62.6)	3	0
Maximum gait speed, m/s	1.94	(1.86-2.01)	6	0		2.1	(2.06-2.13)	4	8		2.01	(1.92-2.09)	6	0		1.87	(1.83-1.92)	6	3.9		1.73	(1.67-1.79)	6	6.8		1.68	(1.49-1.87)	3	0
Maximum gait step length, cm	82.35	(79.7-85.0)	4	1.9		87.02	(85.2-88.9)	3	26		84.7	(82.1-87.3)	4	0		79.5	(76.1-83.0)	4	6.2		74.2	(70.1-78.3)	4	0		70.9	(64.1-77.7)	3	0
Women
Hand-grip strength, kg	20.25	(19.2-21.3)	6	0		22.73	(22.0-23.5)	4	0		21.2	(20.4-22.0)	6	3.6		19.27	(18.4-20.2)	6	0		17.44	(16.5-18.4)	6	0		15.17	(14.1-16.3)	3	0.7
One-legged stance with eyes open, s	37.15	(31.3-43.0)	4	0		48.97	(44.5-53.5)	4	0		39.32	(32.4-46.3)	4	0		27.8	(20.7-34.9)	4	0		19.04	(13.3-24.8)	4	0		11.1	(0.5-21.8)	2	0
Usual gait speed, m/s	1.25	(1.17-1.34)	6	0		1.39	(1.35-1.44)	4	0		1.32	(1.25-1.39)	6	0		1.18	(1.13-1.24)	6	0		1.06	(0.98-1.15)	6	0		0.927	(0.85-1.00)	3	0.3
Usual gait step length, cm	61.43	(58.4-65.5)	4	0		65.73	(63.1-68.4)	3	0		64.4	(61.0-67.7)	4	0		58.6	(55.6-61.7)	4	0		54.4	(50.4-58.4)	4	0		48.6	(44.1-53.1)	3	0
Maximum gait speed, m/s	1.73	(1.65-1.81)	6	9.4		1.93	(1.90-1.96)	4	0		1.81	(1.74-1.87)	6	16.8		1.65	(1.60-1.70)	6	0		1.5	(1.41-1.58)	6	0.2		1.34	(1.23-1.46)	3	0
Maximum gait step length, cm	70.2	(67.0-73.4)	4	0		75.02	(72.7-77.3)	3	0		72.5	(69.1-76.0)	4	0		67.9	(65.1-70.6)	4	0		62.3	(57.8-66.8)	4	0		56.5	(51.5-61.6)	3	0
CI = confidence interval. All P values for Cochran's Q statistic exceed 0.05.

## Sheet: Table S7
Table S7. Quintiles of weight-adjusted hand-grip strength and height-adjusted gait speed and step length according to age group (men)
Physical performance measures	Quintile levels		Age
			Overall	65-69	70-74	75-79	80-84	85 or over
Weight-adjusted hand-grip strength	5	(Highest)	0.63 <=	0.66 <=	0.63 <=	0.61 <=	0.60 <=	0.53 <=
[strength (kg)/weight (kg)]	4		0.56-0.62	0.60-0.65	0.57-0.62	0.55-0.60	0.52-0.59	0.47-0.52
	3		0.51-0.55	0.56-0.59	0.51-0.56	0.49-0.54	0.46-0.51	0.43-0.46
	2		0.44-0.50	0.49-0.55	0.45-0.50	0.43-0.48	0.40-0.45	0.35-0.42
	1	(Lowest)	<= 0.43	<= 0.48	<= 0.44	<= 0.42	<= 0.39	<= 0.34
Height-adjusted usual gait speed	5	(Highest)	0.93 <=	0.97 <=	0.93 <=	0.91 <=	0.86 <=	0.84 <=
[speed (m/s)/height (m)]	4		0.85-0.92	0.89-0.96	0.86-0.92	0.82-0.90	0.78-0.85	0.76-0.83
	3		0.78-0.84	0.83-0.88	0.80-0.85	0.75-0.81	0.70-0.77	0.70-0.75
	2		0.69-0.77	0.75-0.82	0.72-0.79	0.67-0.74	0.60-0.69	0.59-0.69
	1	(Lowest)	<= 0.68	<= 0.74	<= 0.71	<= 0.66	<= 0.59	<= 0.58
Height-adjusted usual gait step length	5	(Highest)	46.9 <=	48.4 <=	47.2 <=	46.6 <=	43.7 <=	43.2 <=
[length (cm)/height (m)]	4		44.1-46.8	45.4-48.3	44.5-47.1	43.1-46.5	41.1-43.6	39.5-43.1
	3		41.4-44.0	43.2-45.3	42.2-44.4	40.2-43.0	37.7-41.0	35.8-39.4
	2		38.3-41.3	40.5-43.1	39.6-42.1	36.6-40.1	33.5-37.6	30.8-35.7
	1	(Lowest)	<= 38.2	<= 40.4	<= 39.5	<= 36.5	<= 33.4	<= 30.7
Height-adjusted maximum gait speed	5	(Highest)	1.38 <=	1.44 <=	1.42 <=	1.34 <=	1.27 <=	1.24 <=
[speed (m/s)/height (m)]	4		1.26-1.37	1.32-1.43	1.27-1.41	1.22-1.33	1.15-1.26	1.15-1.23
	3		1.15-1.25	1.24-1.31	1.18-1.26	1.13-1.21	1.06-1.14	1.06-1.14
	2		1.04-1.14	1.13-1.23	1.07-1.17	1.01-1.12	0.91-1.05	0.86-1.05
	1	(Lowest)	<= 1.03	<= 1.12	<= 1.06	<= 1.00	<= 0.90	<= 0.85
Height-adjusted maximum gait step length	5	(Highest)	56.5 <=	57.2 <=	57.5 <=	55.5 <=	52.6 <=	51.4 <=
[length (cm)/height (m)]	4		53.2-56.4	55.1-57.1	53.8-57.4	52.4-55.4	49.7-52.5	47.8-51.3
	3		50.8-53.1	52.5-55.0	51.5-53.7	49.2-52.3	45.7-49.6	45.6-47.7
	2		46.9-50.7	49.8-52.4	48.5-51.4	45.2-49.1	40.6-45.6	40.1-45.5
	1	(Lowest)	<= 46.8	<= 49.7	<= 48.4	<= 45.1	<= 40.5	<= 40.0

## Sheet: Table S8
Table S8. Quintiles of weight-adjusted hand-grip strength and height-adjusted gait speed and step length according to age group (women)
Physical performance measures	Quintile levels		Age
			Overall	65-69	70-74	75-79	80-84	85 or over
Weight-adjusted hand-grip strength	5	(Highest)	0.49 <=	0.51 <=	0.50 <=	0.47 <=	0.45 <=	0.44 <=
[strength (kg)/weight (kg)]	4		0.43-0.48	0.46-0.50	0.44-0.49	0.42-0.46	0.39-0.44	0.38-0.43
	3		0.38-0.42	0.41-0.45	0.39-0.43	0.37-0.41	0.35-0.38	0.31-0.37
	2		0.32-0.37	0.37-0.40	0.34-0.38	0.31-0.36	0.29-0.34	0.23-0.30
	1	(Lowest)	<= 0.31	<= 0.36	<= 0.33	<= 0.30	<= 0.28	<= 0.22
Height-adjusted usual gait speed	5	(Highest)	0.98 <=	1.04 <=	1.00 <=	0.93 <=	0.89 <=	0.83 <=
[speed (m/s)/height (m)]	4		0.90-0.97	0.96-1.03	0.92-0.99	0.85-0.92	0.79-0.88	0.67-0.82
	3		0.82-0.89	0.89-0.95	0.86-0.91	0.77-0.84	0.69-0.78	0.60-0.66
	2		0.71-0.81	0.82-0.88	0.76-0.85	0.67-0.76	0.57-0.68	0.50-0.59
	1	(Lowest)	<= 0.70	<= 0.81	<= 0.75	<= 0.66	<= 0.56	<= 0.49
Height-adjusted usual gait step length	5	(Highest)	46.5 <=	47.6 <=	47.0 <=	45.5 <=	43.8 <=	39.7 <=
[length (cm)/height (m)]	4		43.5-46.4	45.1-47.5	44.3-46.9	41.8-45.4	39.7-43.7	35.3-39.6
	3		40.8-43.4	42.9-45.0	42.0-44.2	39.0-41.7	36.4-39.6	32.1-35.2
	2		36.8-40.7	40.0-42.8	39.1-41.9	35.5-38.9	32.2-36.3	29.3-32.0
	1	(Lowest)	<= 36.7	<= 39.9	<= 39.0	<= 35.4	<= 32.1	<= 29.2
Height-adjusted maximum gait speed	5	(Highest)	1.34 <=	1.42 <=	1.36 <=	1.28 <=	1.23 <=	1.19 <=
[speed (m/s)/height (m)]	4		1.23-1.33	1.32-1.41	1.25-1.35	1.18-1.27	1.10-1.22	1.00-1.18
	3		1.13-1.22	1.23-1.31	1.16-1.24	1.09-1.17	0.97-1.09	0.89-0.99
	2		1.00-1.12	1.13-1.22	1.05-1.15	0.96-1.08	0.84-0.96	0.70-0.88
	1	(Lowest)	<= 0.99	<= 1.12	<= 1.04	<= 0.95	<= 0.83	<= 0.69
Height-adjusted maximum gait step length	5	(Highest)	52.6 <=	53.8 <=	52.8 <=	52.0 <=	49.8 <=	47.2 <=
[length (cm)/height (m)]	4		49.6-52.5	51.1-53.7	50.1-52.7	48.5-51.9	45.3-49.7	42.4-47.1
	3		46.8-49.5	49.1-51.0	47.5-50.0	45.1-48.4	41.5-45.2	38.1-42.3
	2		42.6-46.7	46.7-49.0	44.7-47.4	41.6-45.0	36.9-41.4	33.3-38.0
	1	(Lowest)	<= 42.5	<= 46.6	<= 44.6	<= 41.5	<= 36.8	<= 33.2
